# Supplementary material for: Photosynthesis of C3, C3–C4, and C4 grasses at glacial CO2
Source: PubMed Central journal article supplement (PMC4085965; doi:10.1093/jxb/eru155), 2014-04-10
Supplement: supp_eru155_116947_Supplementary_Table_S1.pdf [file supp_eru155_116947_Supplementary_Table_S1.pdf]

**Supplementary Table S1. Summary of leaf gas exchange, resource use efficiency and activity of photosynthetic enzymes.**

Ten grass species were grown at glacial (180  $\mu\text{l L}^{-1}$ ) or ambient (400  $\mu\text{l L}^{-1}$ ) [ $\text{CO}_2$ ]. Values are means ( $n = 3-4$ )  $\pm$  SE. Superscripts indicate the ranking of species within each raw using a multiple-comparison, Tukey test. Values followed by the same letter are not significantly different at the 5% level. n/d = not detected.

| Parameter                                                                    | [ $\text{CO}_2$ ]<br>( $\mu\text{l L}^{-1}$ ) | C <sub>3</sub>                 | C <sub>3</sub> -C <sub>4</sub> | C <sub>4</sub> , NAD-ME       |                                | C <sub>4</sub> , PCK           |                              |                                |                               | C <sub>4</sub> , NADP-ME       |                               |
|------------------------------------------------------------------------------|-----------------------------------------------|--------------------------------|--------------------------------|-------------------------------|--------------------------------|--------------------------------|------------------------------|--------------------------------|-------------------------------|--------------------------------|-------------------------------|
|                                                                              |                                               | <i>P. bisulcatum</i>           | <i>P. milioides</i>            | <i>A. lappacea</i>            | <i>P. coloratum</i>            | <i>H. contortus</i>            | <i>P. monticola</i>          | <i>P. maximum</i>              | <i>C. gayana</i>              | <i>Z. mays</i>                 | <i>E. frumentaceae</i>        |
| <b>Spot leaf gas exchange</b>                                                |                                               |                                |                                |                               |                                |                                |                              |                                |                               |                                |                               |
| $A_{\text{sat}}$<br>( $\mu\text{mol m}^{-2} \text{s}^{-1}$ )                 | 180                                           | 7 $\pm$ 1 <sup>a</sup>         | 8 $\pm$ 1 <sup>a</sup>         | 25 $\pm$ 0 <sup>c</sup>       | 23 $\pm$ 1 <sup>c</sup>        | 16 $\pm$ 1 <sup>b</sup>        | 25 $\pm$ 0 <sup>c</sup>      | 23 $\pm$ 0 <sup>c</sup>        | 32 $\pm$ 1 <sup>d</sup>       | 27 $\pm$ 0 <sup>cd</sup>       | 27 $\pm$ 2 <sup>cd</sup>      |
|                                                                              | 400                                           | 17 $\pm$ 1 <sup>a</sup>        | 22 $\pm$ 3 <sup>ab</sup>       | 39 $\pm$ 0 <sup>ef</sup>      | 29 $\pm$ 0 <sup>bcd</sup>      | 26 $\pm$ 0 <sup>b</sup>        | 34 $\pm$ 0 <sup>bc</sup>     | 27 $\pm$ 0 <sup>bc</sup>       | 42 $\pm$ 0 <sup>f</sup>       | 33 $\pm$ 1 <sup>cde</sup>      | 38 $\pm$ 1 <sup>ef</sup>      |
| $g_s$<br>( $\text{mol m}^{-2} \text{s}^{-1}$ )                               | 180                                           | 0.24 $\pm$ 0.04 <sup>ab</sup>  | 0.16 $\pm$ 0.02 <sup>a</sup>   | 0.29 $\pm$ 0.01 <sup>ab</sup> | 0.32 $\pm$ 0.01 <sup>abc</sup> | 0.19 $\pm$ 0.01 <sup>a</sup>   | 0.43 $\pm$ 0.02 <sup>b</sup> | 0.35 $\pm$ 0.01 <sup>a-d</sup> | 0.53 $\pm$ 0.08 <sup>de</sup> | 0.48 $\pm$ 0.02 <sup>cde</sup> | 0.64 $\pm$ 0.09 <sup>e</sup>  |
|                                                                              | 400                                           | 0.21 $\pm$ 0.02 <sup>abc</sup> | 0.24 $\pm$ 0.04 <sup>bcd</sup> | 0.21 $\pm$ 0.01 <sup>ab</sup> | 0.19 $\pm$ 0.01 <sup>abc</sup> | 0.15 $\pm$ 0.01 <sup>a</sup>   | 0.26 $\pm$ 0.01 <sup>c</sup> | 0.17 $\pm$ 0.01 <sup>ab</sup>  | 0.33 $\pm$ 0.02 <sup>de</sup> | 0.21 $\pm$ 0.01 <sup>abc</sup> | 0.35 $\pm$ 0.04 <sup>e</sup>  |
| $C_i$<br>( $\mu\text{l L}^{-1}$ )                                            | 180                                           | 115 $\pm$ 4 <sup>e</sup>       | 93 $\pm$ 4 <sup>de</sup>       | 21 $\pm$ 1 <sup>a</sup>       | 36 $\pm$ 1 <sup>ab</sup>       | 35 $\pm$ 8 <sup>ab</sup>       | 47 $\pm$ 3 <sup>bc</sup>     | 41 $\pm$ 4 <sup>ab</sup>       | 55 $\pm$ 12 <sup>bc</sup>     | 44 $\pm$ 4 <sup>ab</sup>       | 70 $\pm$ 5 <sup>cd</sup>      |
|                                                                              | 400                                           | 231 $\pm$ 3 <sup>e</sup>       | 210 $\pm$ 19 <sup>de</sup>     | 57 $\pm$ 9 <sup>a</sup>       | 109 $\pm$ 24 <sup>abc</sup>    | 93 $\pm$ 15 <sup>abc</sup>     | 137 $\pm$ 5 <sup>bcd</sup>   | 103 $\pm$ 12 <sup>abc</sup>    | 159 $\pm$ 13 <sup>cde</sup>   | 80 $\pm$ 19 <sup>ab</sup>      | 162 $\pm$ 23 <sup>cde</sup>   |
| <b>Analysis of A-C<sub>i</sub> curves</b>                                    |                                               |                                |                                |                               |                                |                                |                              |                                |                               |                                |                               |
| <i>in vivo</i> $V_{\text{cmax}}$<br>( $\mu\text{mol m}^{-2} \text{s}^{-1}$ ) | 180                                           | 83 $\pm$ 5                     |                                | 35 $\pm$ 2 <sup>ab</sup>      | 34 $\pm$ 2 <sup>ab</sup>       | 39 $\pm$ 2 <sup>ab</sup>       | 38 $\pm$ 2 <sup>ab</sup>     | 32 $\pm$ 2 <sup>a</sup>        | 50 $\pm$ 2 <sup>c</sup>       | 36 $\pm$ 2 <sup>ab</sup>       | 42 $\pm$ 2 <sup>bc</sup>      |
|                                                                              | 400                                           | 104 $\pm$ 8                    |                                | 46 $\pm$ 1 <sup>bc</sup>      | 37 $\pm$ 1 <sup>a</sup>        | 34 $\pm$ 1 <sup>a</sup>        | 41 $\pm$ 1 <sup>ab</sup>     | 37 $\pm$ 1 <sup>a</sup>        | 46 $\pm$ 1 <sup>bc</sup>      | 41 $\pm$ 1 <sup>ab</sup>       | 52 $\pm$ 1 <sup>c</sup>       |
| <i>in vivo</i> $V_{\text{pmax}}$<br>( $\mu\text{mol m}^{-2} \text{s}^{-1}$ ) | 180                                           |                                |                                | 213 $\pm$ 7 <sup>c</sup>      | 132 $\pm$ 7 <sup>b</sup>       | 103 $\pm$ 6 <sup>ab</sup>      | 108 $\pm$ 7 <sup>ab</sup>    | 107 $\pm$ 7 <sup>ab</sup>      | 115 $\pm$ 7 <sup>ab</sup>     | 110 $\pm$ 6 <sup>ab</sup>      | 91 $\pm$ 7 <sup>a</sup>       |
|                                                                              | 400                                           |                                |                                | 170 $\pm$ 4 <sup>c</sup>      | 90 $\pm$ 4 <sup>a</sup>        | 82 $\pm$ 4 <sup>a</sup>        | 86 $\pm$ 4 <sup>a</sup>      | 84 $\pm$ 4 <sup>a</sup>        | 150 $\pm$ 4 <sup>b</sup>      | 86 $\pm$ 4 <sup>a</sup>        | 80 $\pm$ 4 <sup>a</sup>       |
| $V_p/V_c$                                                                    | 180                                           |                                |                                | 6 $\pm$ 0.2 <sup>f</sup>      | 3.9 $\pm$ 0.2 <sup>e</sup>     | 2.6 $\pm$ 0.2 <sup>ab</sup>    | 2.8 $\pm$ 0.2 <sup>bc</sup>  | 3.2 $\pm$ 0.2 <sup>ab</sup>    | 2.3 $\pm$ 0.2 <sup>ab</sup>   | 3 $\pm$ .2 <sup>de</sup>       | 2 $\pm$ 0.2 <sup>a</sup>      |
|                                                                              | 400                                           |                                |                                | 3.7 $\pm$ 0.1 <sup>c</sup>    | 2.5 $\pm$ 0.1 <sup>b</sup>     | 2.5 $\pm$ 0.1 <sup>b</sup>     | 2.1 $\pm$ 0.1 <sup>ad</sup>  | 2.3 $\pm$ 0.1 <sup>b</sup>     | 3.3 $\pm$ 0.1 <sup>c</sup>    | 2 $\pm$ 0.1 <sup>ab</sup>      | 1.5 $\pm$ 0.1 <sup>a</sup>    |
| <b>Resource use efficiency</b>                                               |                                               |                                |                                |                               |                                |                                |                              |                                |                               |                                |                               |
| PWUE<br>( $\mu\text{mol mol}^{-1}$ )                                         | 180                                           | 32 $\pm$ 3 <sup>a</sup>        | 48 $\pm$ 2 <sup>ab</sup>       | 84 $\pm$ 1 <sup>d</sup>       | 73 $\pm$ 5 <sup>cd</sup>       | 83 $\pm$ 5 <sup>d</sup>        | 59 $\pm$ 2 <sup>bc</sup>     | 65 $\pm$ 2 <sup>bcd</sup>      | 63 $\pm$ 7 <sup>bc</sup>      | 55 $\pm$ 2 <sup>bc</sup>       | 45 $\pm$ 5 <sup>ab</sup>      |
|                                                                              | 400                                           | 83 $\pm$ 3 <sup>a</sup>        | 94 $\pm$ 12 <sup>ab</sup>      | 189 $\pm$ 6 <sup>d</sup>      | 158 $\pm$ 15 <sup>cd</sup>     | 177 $\pm$ 10 <sup>d</sup>      | 131 $\pm$ 2 <sup>bc</sup>    | 159 $\pm$ 9 <sup>cd</sup>      | 126 $\pm$ 8 <sup>bc</sup>     | 160 $\pm$ 11 <sup>cd</sup>     | 113 $\pm$ 14 <sup>ab</sup>    |
| PNUE<br>( $\text{mmol mol}^{-1} \text{s}^{-1}$ )                             | 180                                           | 0.06 $\pm$ 0.02 <sup>ab</sup>  | 0.06 $\pm$ 0.01 <sup>a</sup>   | 0.16 $\pm$ 0.02 <sup>ab</sup> | 0.10 $\pm$ 0.02 <sup>abc</sup> | 0.15 $\pm$ 0.05 <sup>abc</sup> | 0.18 $\pm$ 0.01 <sup>b</sup> | 0.13 $\pm$ 0.02 <sup>abc</sup> | 0.43 $\pm$ 0.02 <sup>d</sup>  | 0.06 $\pm$ 0.01 <sup>a</sup>   | 0.19 $\pm$ 0.02 <sup>c</sup>  |
|                                                                              | 400                                           | 0.20 $\pm$ 0.05 <sup>ab</sup>  | 0.28 $\pm$ 0.08 <sup>ab</sup>  | 0.25 <sup>c</sup>             | 0.18 $\pm$ 0.02 <sup>a</sup>   | 0.18 $\pm$ 0.02 <sup>a</sup>   | 0.18 $\pm$ 0.01 <sup>a</sup> | 0.28 $\pm$ 0.04 <sup>bc</sup>  | 0.59 $\pm$ 0.02 <sup>b</sup>  | 0.22 $\pm$ 0.01 <sup>ab</sup>  | 0.32 $\pm$ 0.04 <sup>ab</sup> |
| PDM<br>( $\text{g plant}^{-1}$ )                                             | 180                                           | 12 $\pm$ 1 <sup>ab</sup>       | 10 $\pm$ 1 <sup>a</sup>        | 30 $\pm$ 1 <sup>cd</sup>      | 18 $\pm$ 1 <sup>b</sup>        | 31 $\pm$ 1 <sup>cd</sup>       | 36 $\pm$ 1 <sup>de</sup>     | 27 $\pm$ 1 <sup>c</sup>        | 38 $\pm$ 1 <sup>e</sup>       | 34 $\pm$ 1 <sup>de</sup>       | 25 $\pm$ 1 <sup>c</sup>       |
|                                                                              | 400                                           | 41 $\pm$ 1 <sup>bc</sup>       | 15 $\pm$ 1 <sup>a</sup>        | 35 $\pm$ 1 <sup>b</sup>       | 15 $\pm$ 1 <sup>a</sup>        | 42 $\pm$ 1 <sup>bc</sup>       | 33 $\pm$ 1 <sup>b</sup>      | 45 $\pm$ 1 <sup>cd</sup>       | 53 $\pm$ 1 <sup>d</sup>       | 86 $\pm$ 1 <sup>e</sup>        | 47 $\pm$ 1 <sup>cd</sup>      |
| <b>Enzyme activity</b>                                                       |                                               |                                |                                |                               |                                |                                |                              |                                |                               |                                |                               |
| Rubisco activity<br>( $\mu\text{mol m}^{-2} \text{s}^{-1}$ )                 | 180                                           | 55 $\pm$ 15 <sup>c</sup>       | 43 $\pm$ 14 <sup>abc</sup>     | 64 $\pm$ 2 <sup>bc</sup>      | 52 $\pm$ 3 <sup>bc</sup>       | 35 $\pm$ 2 <sup>abc</sup>      | 23 $\pm$ 3 <sup>ab</sup>     | 30 $\pm$ 1 <sup>abc</sup>      | 31 $\pm$ 3 <sup>ab</sup>      | 38 $\pm$ 3 <sup>abc</sup>      | 15 $\pm$ 3 <sup>a</sup>       |
|                                                                              | 400                                           | 23 $\pm$ 2 <sup>abc</sup>      | 44 $\pm$ 11 <sup>de</sup>      | 54 $\pm$ 2 <sup>e</sup>       | 33 $\pm$ 2 <sup>cd</sup>       | 19 $\pm$ 1 <sup>ab</sup>       | 28 $\pm$ 1 <sup>abcd</sup>   | 25 $\pm$ 2 <sup>abc</sup>      | 36 $\pm$ 4 <sup>bcd</sup>     | 33 $\pm$ 2 <sup>abcd</sup>     | 17 $\pm$ 2 <sup>a</sup>       |

|                                          |     |  |  |                    |                 |                     |                    |                     |                     |                    |                 |
|------------------------------------------|-----|--|--|--------------------|-----------------|---------------------|--------------------|---------------------|---------------------|--------------------|-----------------|
| PEPC activity                            | 180 |  |  | $181 \pm 10^d$     | $81 \pm 7^{ab}$ | $112 \pm 12^{bc}$   | $46 \pm 1^a$       | $82 \pm 4^{ab}$     | $96 \pm 13^{bc}$    | $134 \pm 9^c$      | $81 \pm 7^{ab}$ |
| ( $\mu\text{mol m}^{-2} \text{s}^{-1}$ ) | 400 |  |  | $123 \pm 14^{cd}$  | $42 \pm 3^{ab}$ | $64 \pm 11^{ab}$    | $55 \pm 5^{ab}$    | $30 \pm 4^a$        | $130 \pm 20^d$      | $83 \pm 4^{bc}$    | $73 \pm 6^{ab}$ |
| PEPC/Rubisco                             | 180 |  |  | $3.1 \pm 0.3^{cd}$ | $1.7 \pm 0.2^a$ | $3.2 \pm 0.4^{a-d}$ | $2.0 \pm 0.5^{ab}$ | $2.8 \pm 0.3^{abc}$ | $3.2 \pm 0.2^{bcd}$ | $3.7 \pm 0.3^{cd}$ | $4.7 \pm 0.3^d$ |
|                                          | 400 |  |  | $2.4 \pm 0.3^{bc}$ | $1.4 \pm 0.1^a$ | $3.2 \pm 0.6^{bc}$  | $2.0 \pm 0.3^{ab}$ | $1.2 \pm 0.1^a$     | $2.8 \pm 0.3^{bc}$  | $2.2 \pm 0.2^{ab}$ | $4.3 \pm 0.4^c$ |
| NADP-ME activity                         | 180 |  |  | $1 \pm 0.3$        | $3 \pm 0.2$     | $3 \pm 0.2$         | n/d                | n/d                 | n/d                 | $33 \pm 3$         | $19 \pm 2$      |
| ( $\mu\text{mol m}^{-2} \text{s}^{-1}$ ) | 400 |  |  | $1 \pm 0.2$        | $1 \pm 0.2$     | $2 \pm 0.2$         | n/d                | n/d                 | n/d                 | $34 \pm 2$         | $30 \pm 6$      |
| PEP-CK activity                          | 180 |  |  | $43 \pm 12^b$      | $40 \pm 8^b$    | $59 \pm 7.4^{bc}$   | $27 \pm 2^a$       | $35 \pm 4^b$        | $67 \pm 9^c$        | $29 \pm 4^a$       | $40 \pm 5^b$    |
| ( $\mu\text{mol m}^{-2} \text{s}^{-1}$ ) | 400 |  |  | $44 \pm 6^c$       | $20 \pm 3^a$    | $39 \pm 6^b$        | $33 \pm 2^b$       | $22 \pm 2^a$        | $64 \pm 14^d$       | $31 \pm 2^b$       | $36 \pm 7^b$    |
